# Supplementary material for: T-cells produce acidic niches in lymph nodes to suppress their own effector functions
Source: PubMed Central journal article supplement (PMC7431837; doi:10.1038/s41467-020-17756-7), 2020-08-17

## Supplementary Information

Wu et al., T-cells produce acidic niches in lymph nodes to suppress their own effector functions.

Supplementary Tables S1-S3

Supplementary Figure S1-S18

## Supplementary Tables S1-S3

| <b>Supplementary Table S1:</b> Flow cytometric count of CD3+ cells in the spleen and inguinal lymph nodes of control mice and of mice treated with anti-CD8 and anti-CD4 antibodies to deplete T-cells. |                          |                               |
|---------------------------------------------------------------------------------------------------------------------------------------------------------------------------------------------------------|--------------------------|-------------------------------|
| <b>Mouse</b>                                                                                                                                                                                            | <b>Spleen CD3+ Cells</b> | <b>Lymph Nodes CD3+ Cells</b> |
| Control M1                                                                                                                                                                                              | 34.3                     | N/A                           |
| Control M2                                                                                                                                                                                              | 32.1                     | N/A                           |
| Control M3                                                                                                                                                                                              | 38.1                     | 58.5                          |
| Control M4                                                                                                                                                                                              | 29.6                     | 63.5                          |
| Control M5                                                                                                                                                                                              | 34.8                     | 60.4                          |
| Control M6                                                                                                                                                                                              | 32.7                     | 74.8                          |
| Control M7                                                                                                                                                                                              | 35.8                     | 77.5                          |
| Control MEAN ( <i>SEM</i> )                                                                                                                                                                             | 33.91 (1.04)             | 66.94 (3.87)                  |
| Depleted M7                                                                                                                                                                                             | 8.29                     | 1.59                          |
| Depleted M8                                                                                                                                                                                             | 8.11                     | 15.4                          |
| Depleted M9                                                                                                                                                                                             | 7.04                     | 17.0                          |
| Depleted M10                                                                                                                                                                                            | 6.14                     | 13.7                          |
| Depleted M11                                                                                                                                                                                            | 5.94                     | 11.3                          |
| Depleted M12                                                                                                                                                                                            | 5.14                     | 17.4                          |
| Depleted M13                                                                                                                                                                                            | 11.2                     | 14.6                          |
| Depleted MEAN ( <i>SEM</i> )                                                                                                                                                                            | 7.41 (0.77)              | 13.00 (2.05)                  |

**Supplementary Table S2:** Estimate of intracellular lactate, based on metabolic rate and pH gradient.

| T-cell | Extra-cellular Ion | pHe | pHi   | EACR (relative) | EACR (mM/min) | Lactic acid Permeability ( $\mu\text{m/s}$ ) | [Lactate] (mM) |
|--------|--------------------|-----|-------|-----------------|---------------|----------------------------------------------|----------------|
| B6     | Cl                 | 6.6 | 6.916 | 0.503           | 5.028         | 1730                                         | 3.302          |
| B6     | Cl                 | 6.8 | 6.995 | 0.728           | 7.275         | 2448                                         | 4.051          |
| B6     | Cl                 | 7   | 7.027 | 1.006           | 10.057        | 3572                                         | 4.131          |
| B6     | Cl                 | 7.2 | 7.077 | 1.272           | 12.718        | 5319                                         | 3.937          |
| B6     | Cl                 | 7.4 | 7.092 | 1.492           | 14.921        | 8004                                         | 3.183          |
| OT1    | Cl                 | 6.6 | 6.886 | 0.326           | 3.264         | 1730                                         | 2.002          |
| OT1    | Cl                 | 6.8 | 6.947 | 0.56            | 5.604         | 2448                                         | 2.795          |
| OT1    | Cl                 | 7   | 6.990 | 0.864           | 8.639         | 3572                                         | 3.263          |
| OT1    | Cl                 | 7.2 | 7.062 | 1.204           | 12.043        | 5319                                         | 3.603          |
| OT1    | Cl                 | 7.4 | 7.088 | 1.525           | 15.248        | 8004                                         | 3.218          |
| B6     | Glu                | 6.6 | 7.075 | 0.715           | 7.147         | 1730                                         | 6.778          |
| B6     | Glu                | 6.8 | 7.136 | 1.061           | 10.61         | 2448                                         | 8.188          |
| B6     | Glu                | 7   | 7.196 | 1.259           | 12.588        | 3572                                         | 7.646          |
| B6     | Glu                | 7.2 | 7.244 | 1.562           | 15.62         | 5319                                         | 7.114          |
| B6     | Glu                | 7.4 | 7.309 | 1.857           | 18.566        | 8004                                         | 6.528          |
| OT1    | Glu                | 6.6 | 7.078 | 0.738           | 7.378         | 1730                                         | 7.049          |
| OT1    | Glu                | 6.8 | 7.185 | 1.093           | 10.929        | 2448                                         | 9.436          |
| OT1    | Glu                | 7   | 7.225 | 1.166           | 11.663        | 3572                                         | 7.572          |
| OT1    | Glu                | 7.2 | 7.269 | 1.464           | 14.643        | 5319                                         | 7.057          |
| OT1    | Glu                | 7.4 | 7.309 | 1.746           | 17.462        | 8004                                         | 6.129          |

| <b>Supplementary Table S3. Source and Dilutions of antibodies used for flow cytometry</b> |              |        |          |          |
|-------------------------------------------------------------------------------------------|--------------|--------|----------|----------|
| Marker                                                                                    | Fluorochrome | Vendor | Clone    | Dilution |
| CD3 /BV421                                                                                | FITC         | BD     | 145-2c11 | 1:100    |
| CD4                                                                                       | PacBlu       | BD     | RM4-5    | 1:100    |
| CDS                                                                                       | FITC/APC     | BD     | 53-6.7   | 1:100    |
| CD44                                                                                      | PE           | BD     | IM7      | 1:100    |
| CD62L                                                                                     | BUV737       | BD     | MEL-14   | 1:100    |
| IFNg                                                                                      | PE           | BD     | -        | 1:100    |
| CD19                                                                                      | PE           | BD     | 1D3      | 1:100    |
| CD40                                                                                      | BV421        | BD     | 3/23     | 1:100    |

## SUPPLEMENTARY FIGURES AND LEGENDS

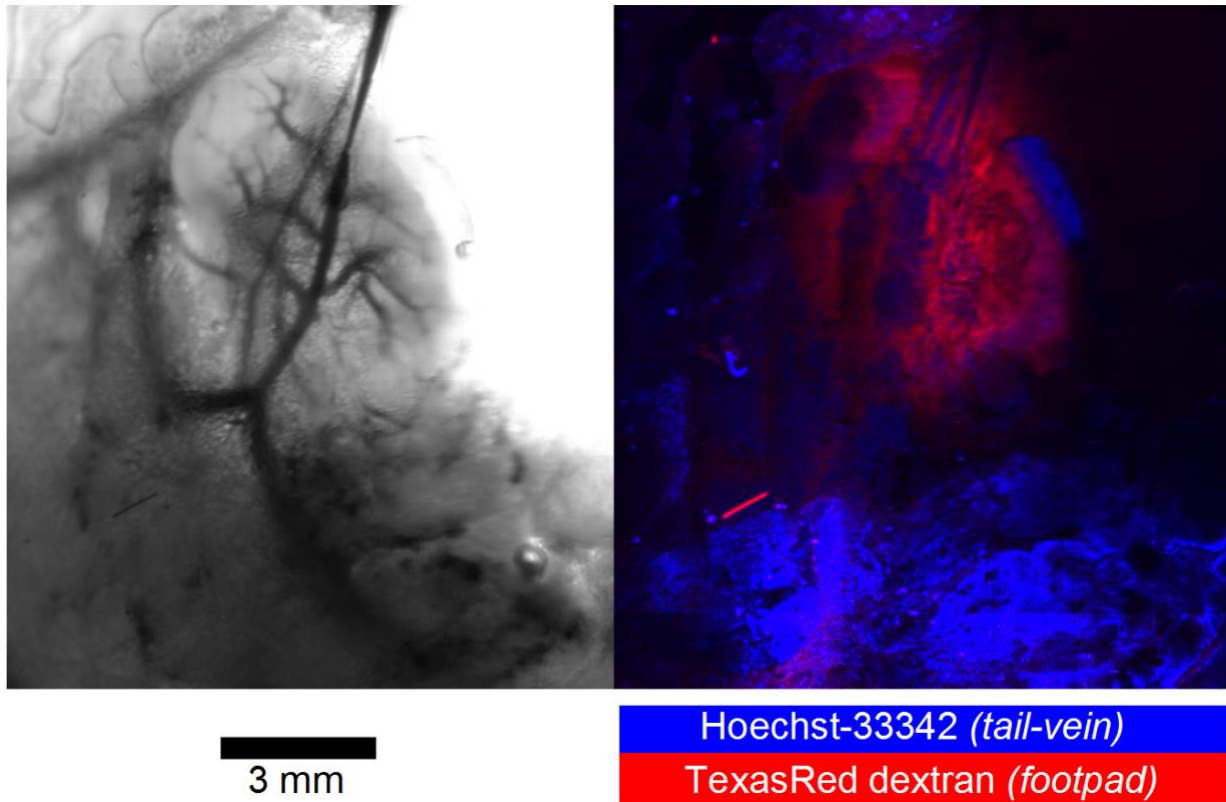

**Supplementary Figure S1:** *Visualising the LN by intravital imaging using window chambers.* Bright-field and corresponding fluorescence image of LN in control mice injected with Hoechst-33342 into the tail vein (10 mg/kg in 100  $\mu$ l), to visualize blood vessels, and TexasRed dextran (50mg/ml in 100  $\mu$ l) into the footpad of the same animal, to demonstrate delivery of substances to the LN. Images collected with x1.6 low power objective. Tail-vein injection occurred 2 hours after footpad injection. Images collected 3 hours after footpad injection. Exemplar of 3 repeats.

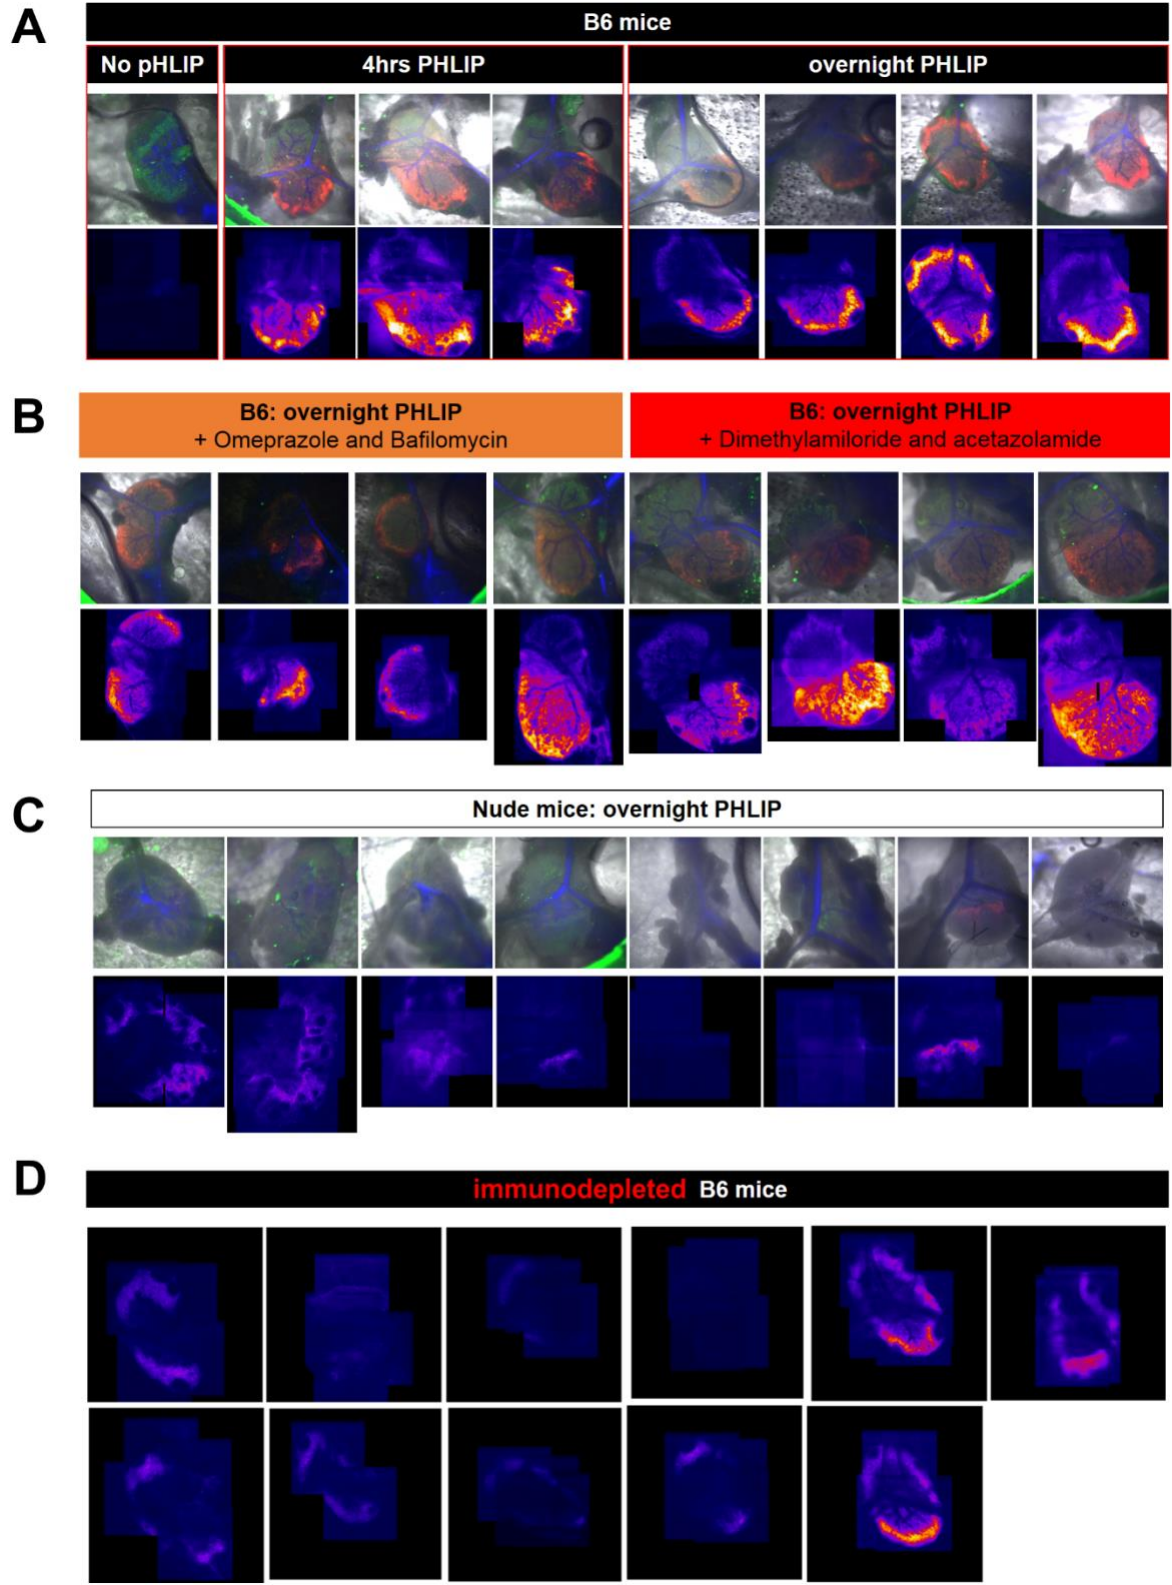

**Supplementary Figure S2: Imaging LNs using pHLIP.** Each field of view is 3.8 x 3.8 mm<sup>2</sup>. **(A)** Intravital imaging of LNs of B6 mice for pHLIP. Control experiment had no pHLIP injected, to confirm lack of

background signal. Imaging was repeated on animals with a 50 $\mu$ l footpad injection of 5 nmoles pHLIP either 4 hrs or 24 hrs prior to imaging. Upper panels show superimposition of bright-field image, visualization of blood vessels (blue) and pHLIP fluorescence collected at low power x1.6. Lower panels show montage of overlapping fields of view obtained for pHLIP, collected as a z-stack and summed across the depth. Exemplar Figures from 3, 4 and 10 repeats on different animals. **(B)** Experiments repeated on B6 mice that had received 200 $\mu$ l intraperitoneal injections of 12.5mg/kg of OME and 1mg/kg of BAF or 5.2mg/kg of DMA and 3.9mg/kg of ATZ 24 hours before pHLIP imaging (all data shown). **(C)** Experiments repeated on nude mice that received pHLIP 24 hours before imaging, showing substantial drop in fluorescence (all data shown). **(D)** Experiments on C57/Bl6 mice treated with anti-CD4 and anti-CD8 antibodies (300  $\mu$ g/mouse) administered IP once per day for 3 days and on every 3<sup>rd</sup> day thereafter to deplete T-cells (see **Fig S3**). Animals were then injected with pHLIP 24 hours before imaging. (all data shown).

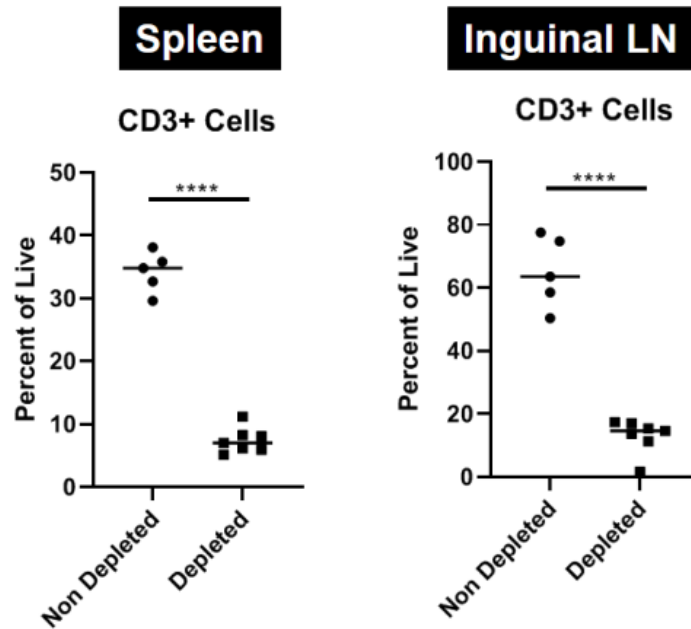

**Supplementary Figure S3:** *Yield of acute Lymphodepletion.* C57/Bl6 mice (n=7 animals) were lymphodepleted with anti-CD4 and anti-CD8 antibodies (300ug/mouse) administered IP once per day for 3 days and on every 3<sup>rd</sup> day thereafter. After 10 days, spleens and inguinal lymph nodes were depleted of CD3+ cells, quantified as percent of live cells by flow, and expressed as percent non-depleted (n=5 animals). Two-sided unpaired T-test,  $p < 0.0001$ .



**A**

Test for autofluorescence

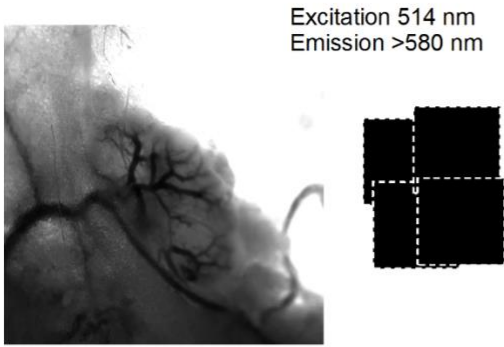**B**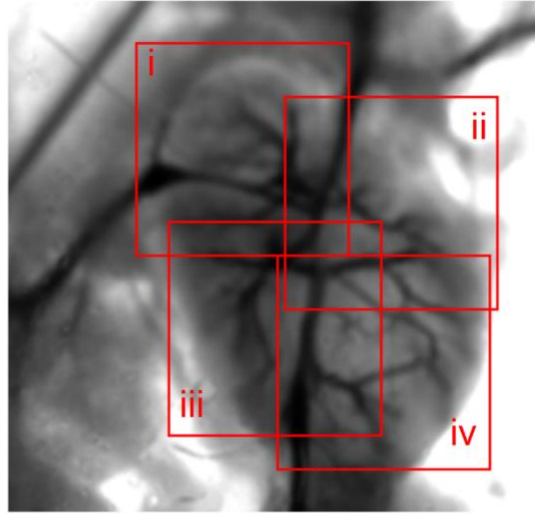**C i**

580 nm

640 nm

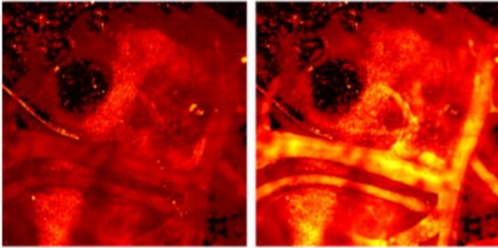**ii**

580 nm

640 nm

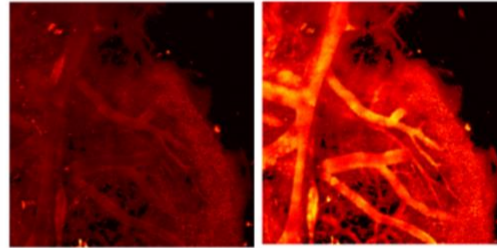**iii**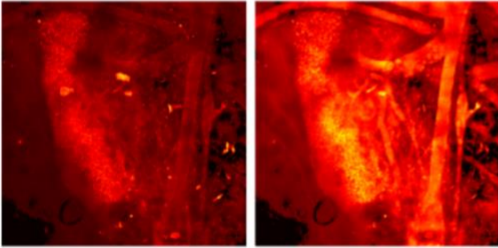**iv**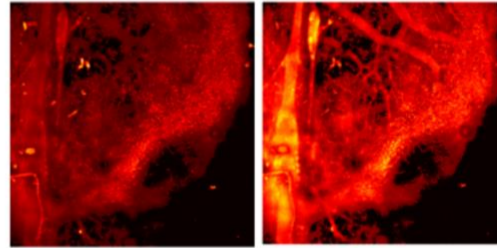**D**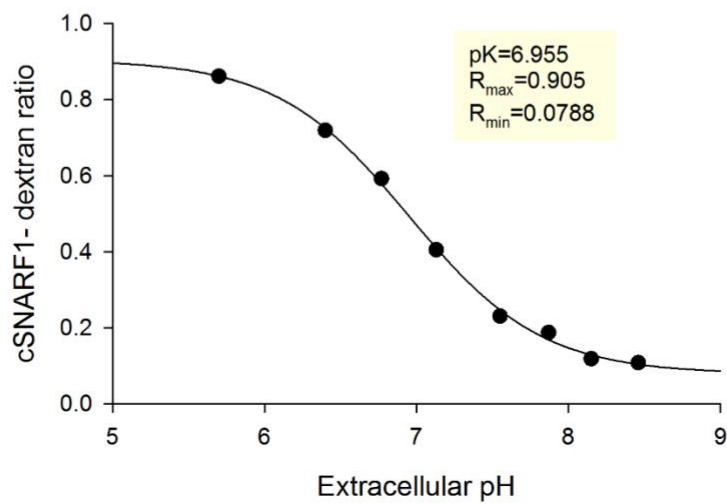

**Supplementary Figure S4:** Pipeline for measuring lymph node pH by intravital imaging. Data represent of 18 separate experiments. **(A)** Bright field image of LN x1.6. Inset shows fluorescence images, collected by x10 objective, of LN region in mice that had not been injected with dextran-cSNARF1. Absence of signal indicates that autofluorescence was negligible under the imaging settings used. *Field of view is 3.8 x 3.8 mm<sup>2</sup>* **(B)** Measurements on mouse injected with dextran-cSNARF1. Bright field image of LN at x1.6 where fluorescence was acquired with a higher power (x10) objective. The pHe map of the LN was then constructed by merging the overlapping cascade of images, using anatomical or fluorescence landmarks to align images correctly. *Each box is 1.55 x 1.55 mm<sup>2</sup>* **(C)** Pairs of fluorescence at 580 nm (560-600 nm) and 640 nm (620-660 nm) for the four fields of view acquired with x10 objective. *Each box is 1.55 x 1.55 mm<sup>2</sup>* **(D)** Calibration curve for cSNARF1-conjugated to 70kDa dextran collected with x10 objective, with best fit to Grinkiewicz equation, showing that the dye is optimal for detecting pH in the range 6-8. *Each field of view is 3.8 x 3.8 mm<sup>2</sup>*

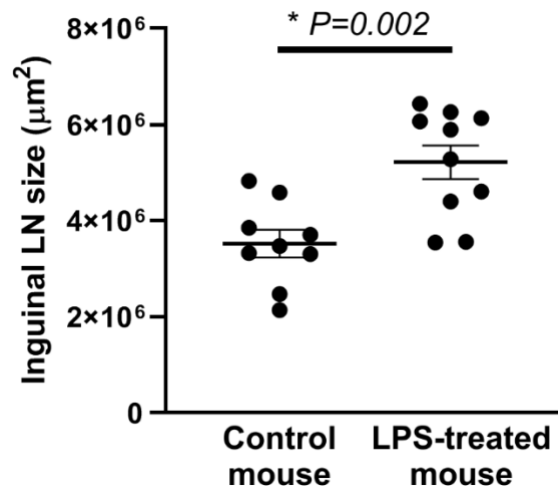

**Supplementary Figure S5.** *Effect of LPS on LN dimensions.* 100 ng/kg LPS was injected i.p. 48 hours prior to images shown in Fig 1I. In a parallel set of mice inguinal LNs were imaged to measure their volumes (N=10 LNs LPS, N=8 LNs controls, data show mean + SD). The X-Y in plane area increased by 50% (p=0.002), indicating a significant increase in LN volume. Two-sided unpaired T-test.

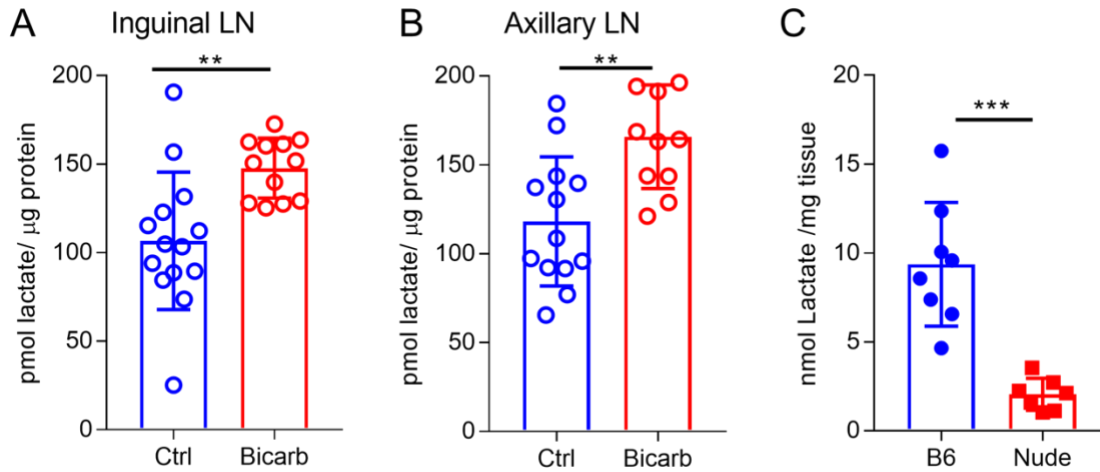

**Supplementary Figure S6: Measurements of [lactate] in LNs. (A&B)** Mice were provided oral 400 mM NaHCO<sub>3</sub> *ad lib* for one week, after which LNs were removed, weighed and lactate concentrations were measured, normalized to mg protein. Data show significantly more lactate in NaHCO<sub>3</sub> treated **(A)** inguinal (control group n=14, bicarbonate group n=12, p=0.0024), and **(B)** axillary (control group n=13, bicarbonate group n=11, p=0.0021) LNs compared to tap water controls. **(C)** Inguinal lymph nodes were removed from C57BL/6 (B6) or nude mice and the lactate concentration were measured. Each lymph node was from separate animal (N=8 each, p=0.00005). Data was expressed as Mean ± SD, and compared using two-tailed, unpaired t-test. Significance level: \*\*p<0.01; \*\*\*p<0.001.

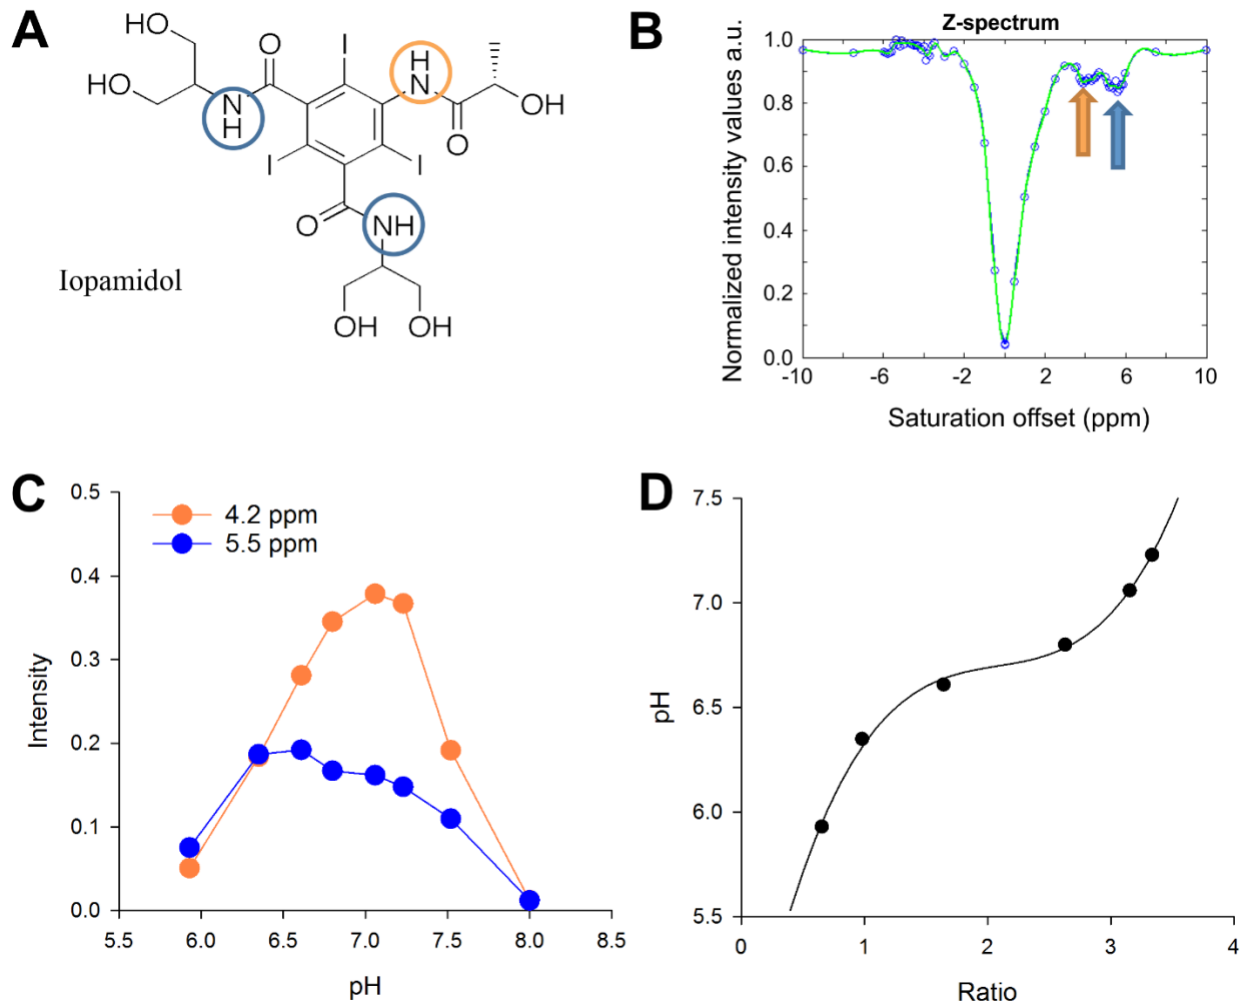

**Supplementary Figure S7: Chemical Exchange Saturation Transfer (CEST) pH imaging.** **(A)** Structure of iopamidol (Isovue) showing ionizable amide groups in red and blue. The two blue groups are co-resonant. **(B)** Z-spectrum generated by measuring water resonance intensity following saturating frequency specific pulses at between +10 and -10 ppm relative to the water resonance at 0 ppm. The two amide resonances are indicated with red and blue arrows. **(C)** Analysis of data from phantoms at different pH. **(D)** Ratio of intensity and its best-fit 5<sup>th</sup> order polynomial.

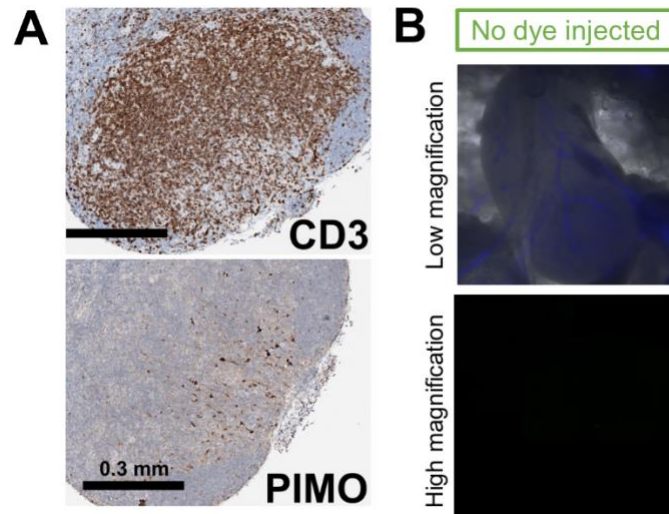

**Supplementary Figure S8: Probing evidence for LN hypoxia. (A)** Staining for hypoxia with pimonidazole (Pimo) injected to B6 mice i.p. (60 mg/kg in 100 $\mu$ l) prior to euthanizing. Inguinal LNs were excised for immunohistochemistry. Images are representative of N=10 LN (CD3) and N=3 LN (pimo), plus no primary controls. **(B)** Determination of background signal in intravital imaging of LN in mice that had not received ImageIT-Green at low (FOV = 3.8 x 3.8 mm<sup>2</sup>) and high (FOV = 1.55 x 1.55 mm<sup>2</sup>) magnification. s

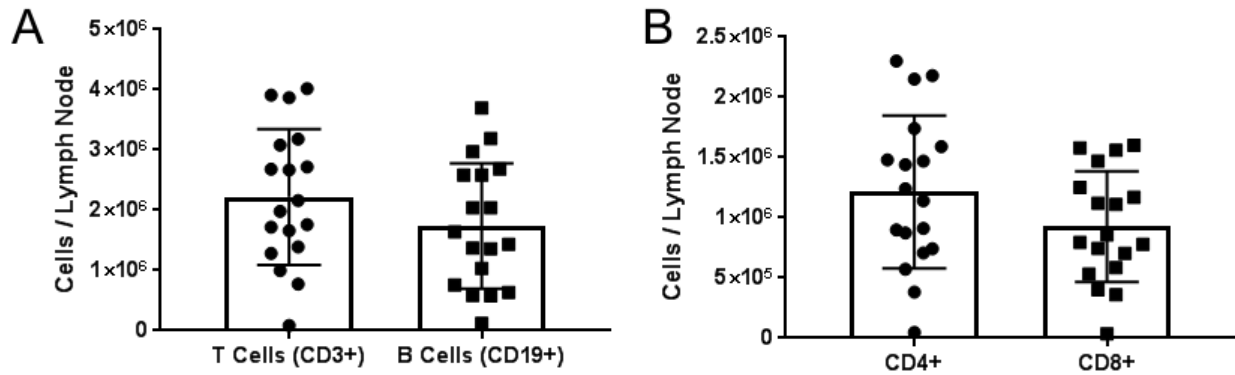

**Supplementary Figure S9.** *T cell counts in Lymph nodes from B6 and nude mice.* LNs were excised for flow cytometric measurements. **(A)** CD3+ T cells and CD19+ B cells, as well as **(B)** CD4+CD3+ and CD8+CD3+ T cells were quantified by flow (n=18). The volumes of inguinal and axillary LNs of C57Bl6 are around  $2.5 \pm 0.3 \text{ mm}^3$  indicating that the density of CD3+ cells in LNs is  $\sim 800$  million per mL. Error bars represent S.D., no statistical test was performed.

# FIGURE S6

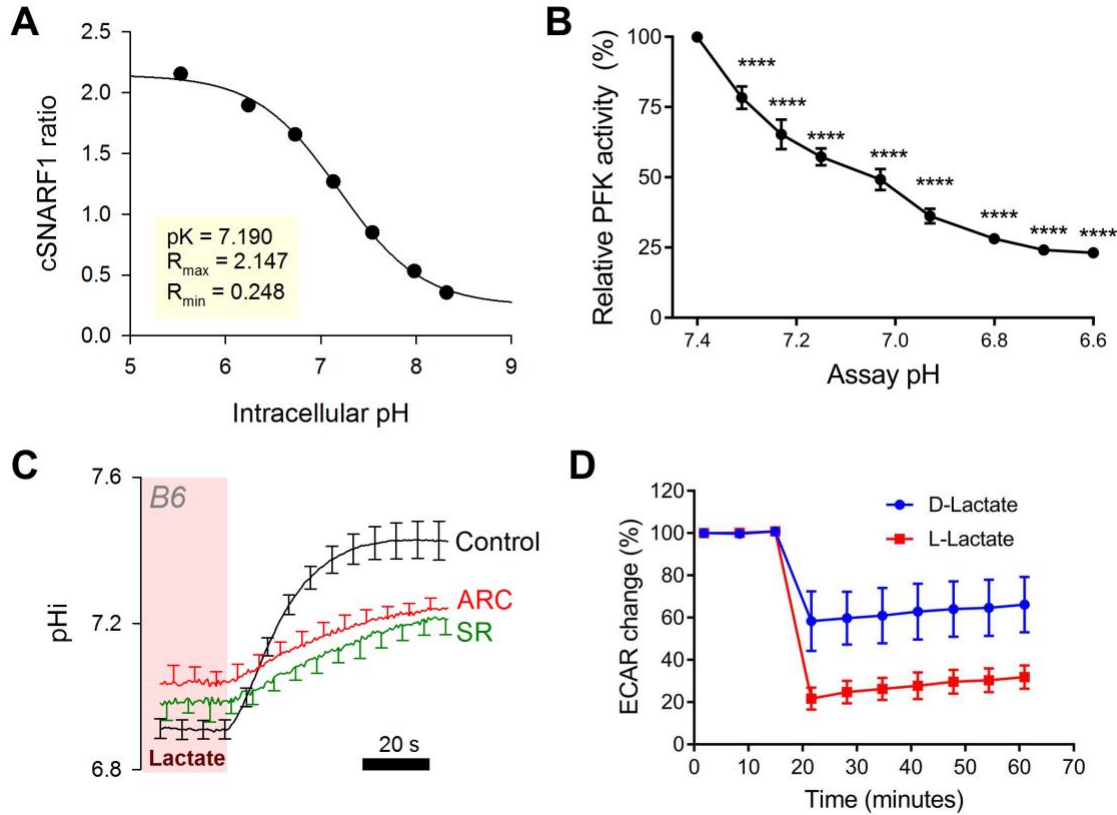

**Supplementary Figure S10: Mechanisms of T cell glycolysis inhibition by acidosis. (A)** Calibration curve for cSNARF1 AM-loaded into B6 cells, performed by the nigericin (10  $\mu$ M) method, showing best fit to Grinkiewicz equation. Mean  $\pm$  SEM of results from 4 experiments, each with 40-60 cells each. **(B)** PFK-1 enzyme activity of homogenate from activated B6 cells measured at different pH (mean  $\pm$  SD; n=3; One way ANOVA with multiple comparisons, p=0.0001). **(C)** Effect of MCT1 inhibitors AR-C (AR-C155858; 10  $\mu$ M; n=7) and SR (SR13800; 10  $\mu$ M; n=7) on rate of pHi change upon rapid removal of extracellular lactate. The ablated rate arises from inhibited MCT activity. Buffering capacity was assumed to be constant (control; n=12). Mean  $\pm$  S.E.M. **(D)** ECAR measured by Seahorse, showing effect of adding L- and D-lactate on glycolytic rate. Note that due to the stereo-specificity of LDH, the inhibitory effect of the L-isoform is stronger (mean  $\pm$  S.D. ; n=3).



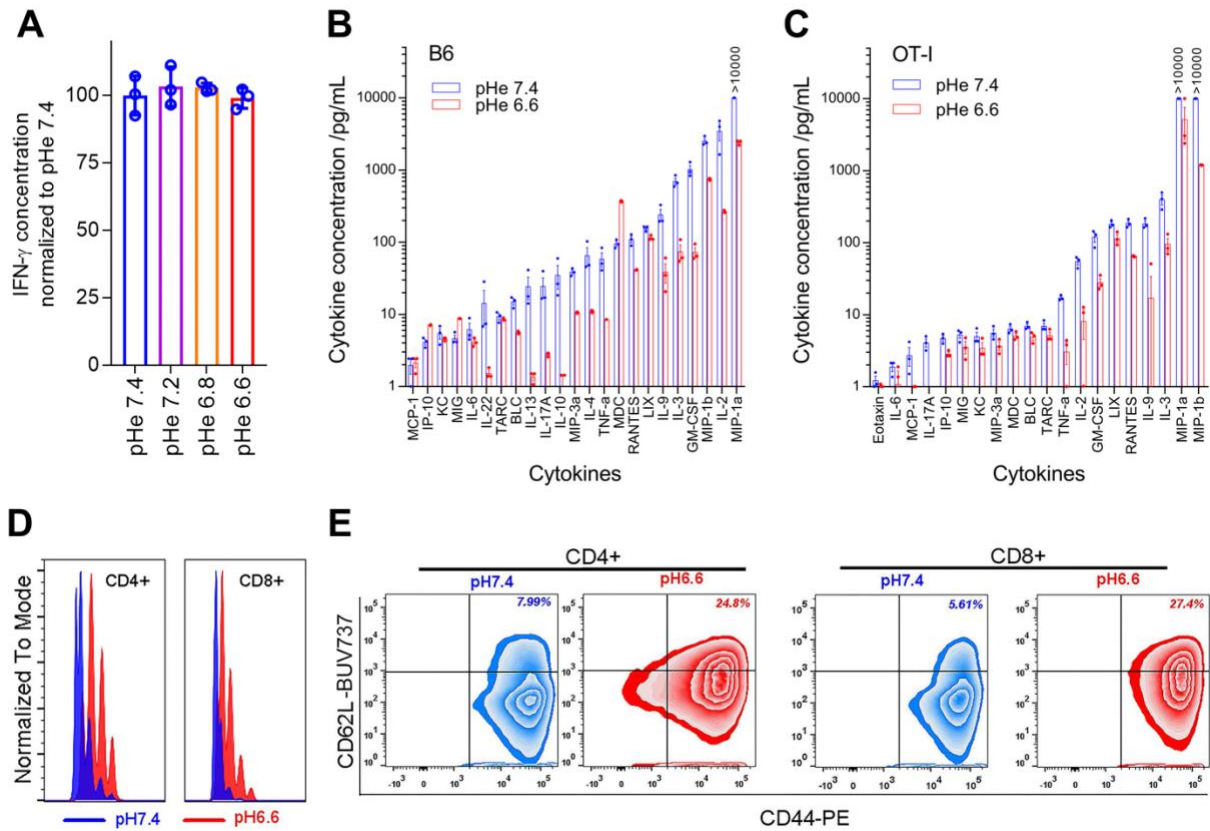

**Supplementary Figure S11: T cells effector functions are inhibited at acidic pH.** (A) Interferon- $\gamma$  (IFN $\gamma$ ) immunoreactivity is stable *in vitro* over a range of pHe. Data are showed as Mean  $\pm$  SD, n=3. (B) Relationship between cytokine levels measured in paired experiments at low and high pH by Cytokine Beads Array assay in B6 T cells Data are showed as Mean  $\pm$  SD, n=3. (C) Experiment repeated in OT-I cells. Data shown as Mean  $\pm$  SD. (D) Proliferation rate of CD4 $^{+}$  and CD8 $^{+}$  cell from total B6 T cell at low and high pH. (E) Fraction of CD44 $^{+}$ CD62L $^{+}$  cells (memory phenotype) is increased at low pHe in CD4 $^{+}$  and CD8 $^{+}$  subpopulation from B6 T cell.

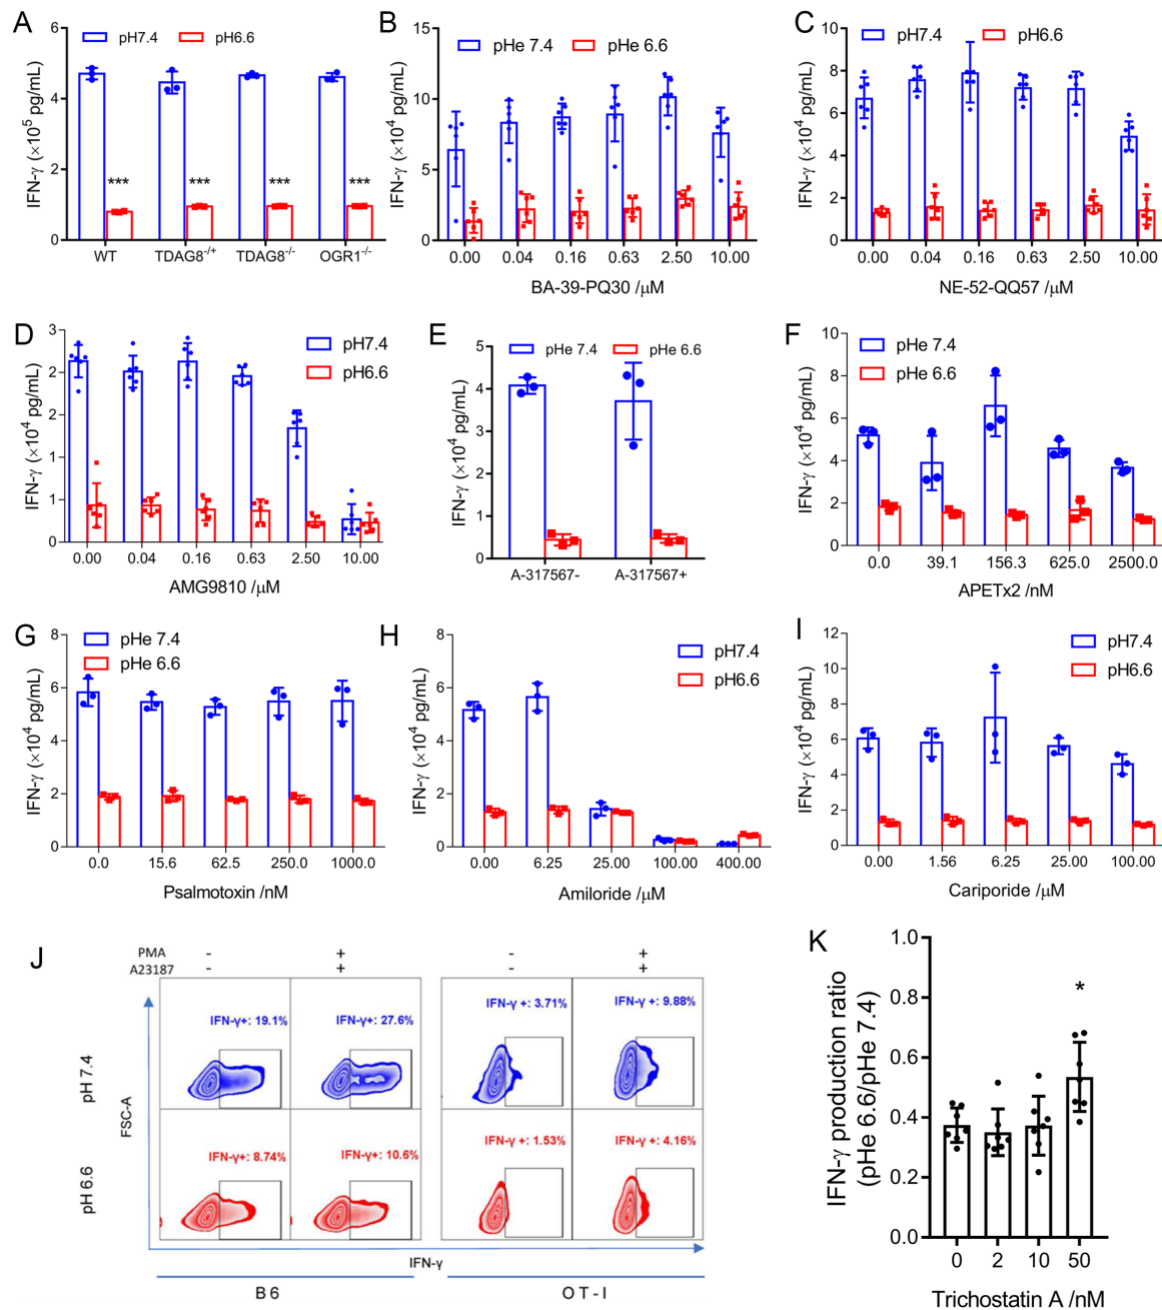

**Supplementary Figure S12: Testing potential mechanisms of pH-sensitivity of cytokine release (all p-values two tailed t-test).** (A) G protein-coupled receptor protein TDAG8 homogeneous (TDAG<sup>-/-</sup>) and heterogeneous (TDAG8<sup>+/+</sup>) knockout and OGR1 knockout (OGR1<sup>-/-</sup>) showed no rescue of IFN $\gamma$  production at low pHe (n=3 each; p-values 6.6 cf. 7.4 WT: p=2.08e-6; TDAG8<sup>+/+</sup>: p=4.09e-5; TDAG8<sup>-/-</sup>: p=4.57e-8; OGR1<sup>-/-</sup>: p=6.55e-7). (B) OGR1 inhibitor BA-39-PQ30 (n=6 each) and (C) GPR4 inhibitor NE-52-QQ57 (n=6 each) did not rescue IFN $\gamma$  production at low pHe. (D) Inhibitors of TRPV1 (n=6 each), (E) ASIC-3 (n=3 each), (F) ASIC-3 (n=3 each), (G) ASIC1a (n=3 each), (H) ENaC (n=3 each) and (I) NHE1 (n=3 each) were unable to rescue IFN $\gamma$  production at low pHe. (J) The phorbol 12-myristate 13-acetate plus A23187 (n=3 each) and

**(K)** a low dose of Trichostatin A, a histone deacetylase inhibitor, only partially restored IFN $\gamma$  production at pH 6.6, compared to pH 7.4 ((n=7, p=0.0063). Data are expressed as Mean  $\pm$  SD; Two-tailed, unpaired t test was used for comparison. \*, p<0.05; \*\*, p<0.01; \*\*\*, p<0.001; \*\*\*\*, p<0.0001.

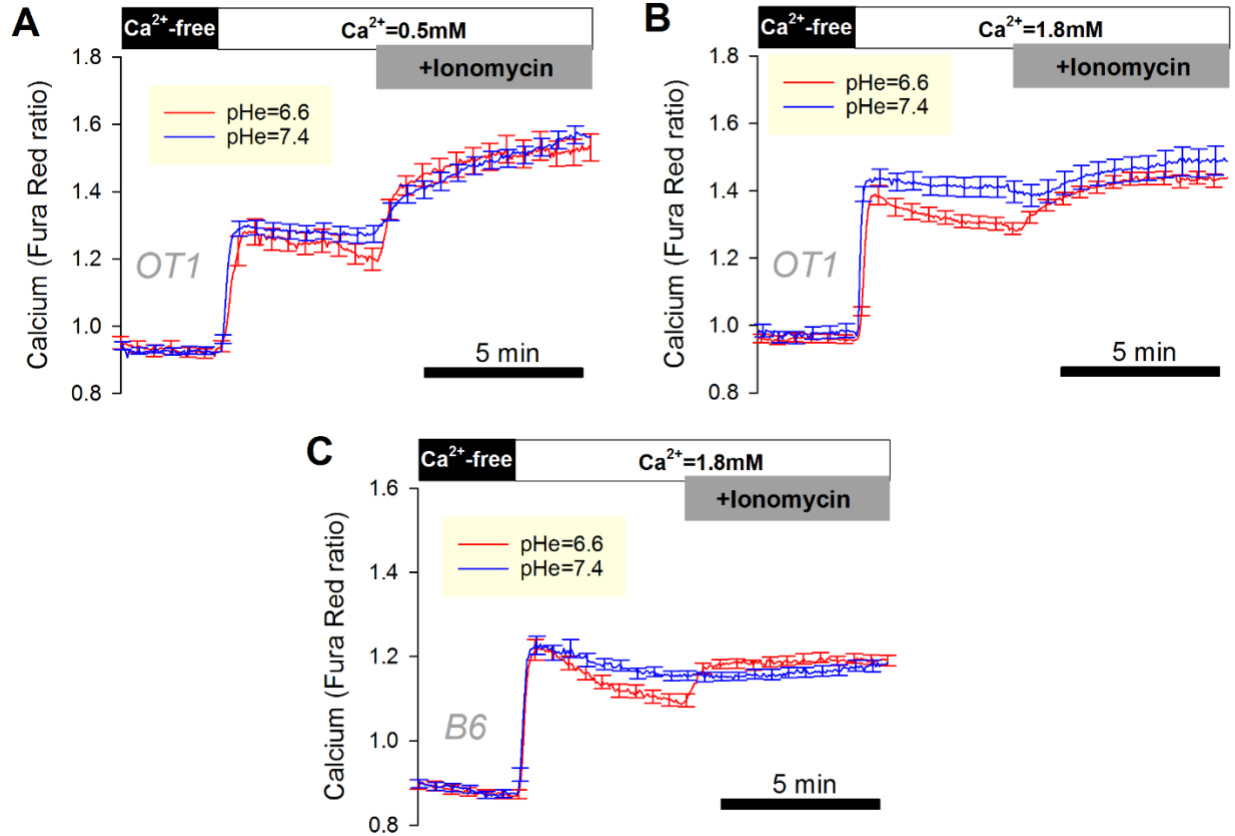

**Supplementary Figure S13: Investigating the effect of acid-inhibition of calcium signaling. (A)** Protocol for interrogating store-operated Ca<sup>2+</sup> entry. Superfused OT-I T cells were loaded with Fura-Red and exposed to 10  $\mu$ M thapsigargin for 10 min in Ca<sup>2+</sup>-free (0.5mM EGTA) conditions to deplete the endoplasmic reticulum (ER) Ca<sup>2+</sup> store. Next, extracellular Ca<sup>2+</sup> was raised to 0.5 mM by rapid solution switching at either pHe 7.4 or 6.6. The slope and extent of intracellular Ca<sup>2+</sup> rise (Fura-Red ratio) is a readout of Ca<sup>2+</sup> entry. Ionomycin (10  $\mu$ M) was added at the end of the experiment as a positive control for Ca<sup>2+</sup> entry. N=20 (pH 6.6), 25 (pH 7.4). (B) Experiment repeated with higher Ca<sup>2+</sup> (1.8 mM) in OT-I cells. N=15 (pH 6.6), 18 (pH 7.4) (C) Experiment repeated with B6 cells using 1.8 mM Ca<sup>2+</sup>. Time courses show mean  $\pm$  SEM of 15-25 cells each. N=21 (pH 6.6), 22 (pH 7.4).

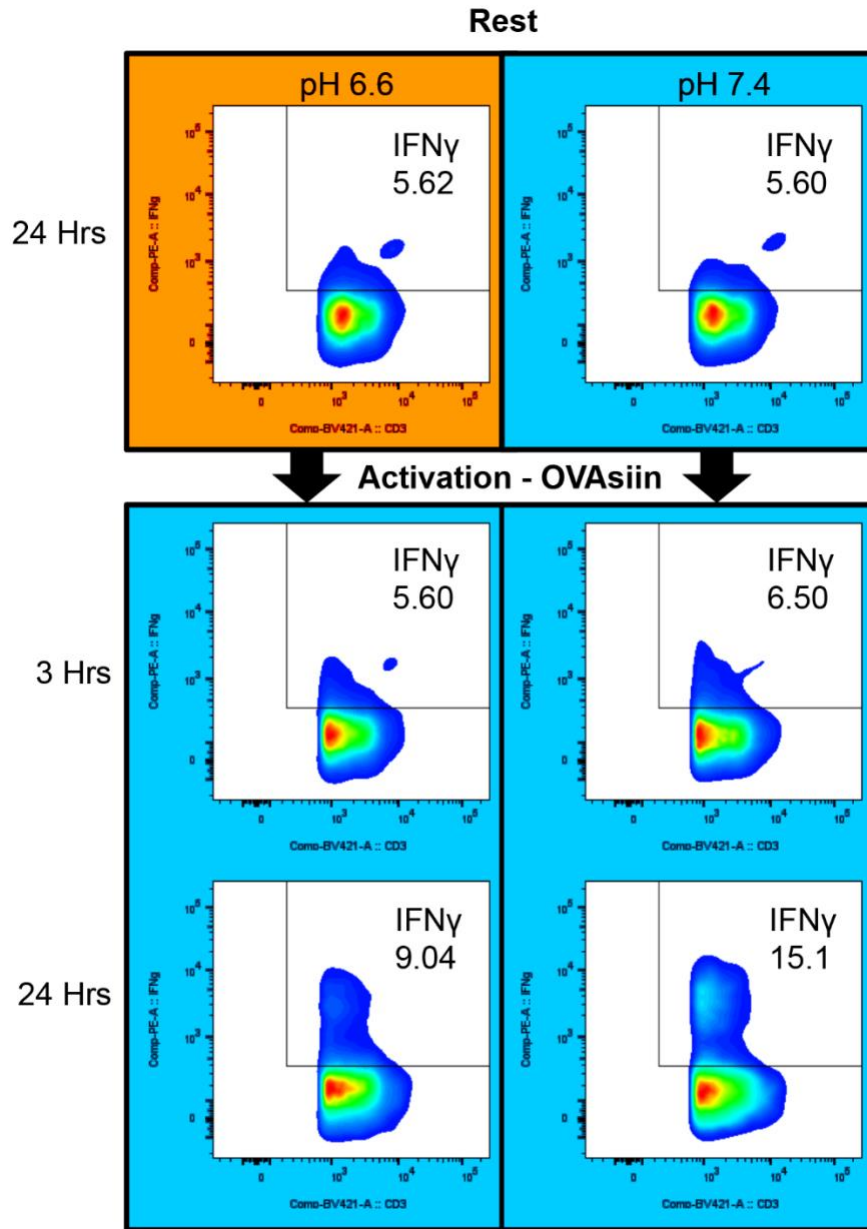

**Supplementary Figure S14:** Resting T cells at pHe 6.6 or 7.4 had no effect on IFN $\gamma$  measured at pHe 7.4 with stimulation. T cells were rested at pHe 6.6 or 7.4 for 24 hours, and then activated with OVA<sub>257-264</sub> (SIINFEKL) peptide at pHe 7.4 for an additional 24 hours. Intracellular IFN $\gamma$  staining was measured during initial rest period and activation period by flow cytometry. Gating Strategies are shown in Fig. S18A-D.

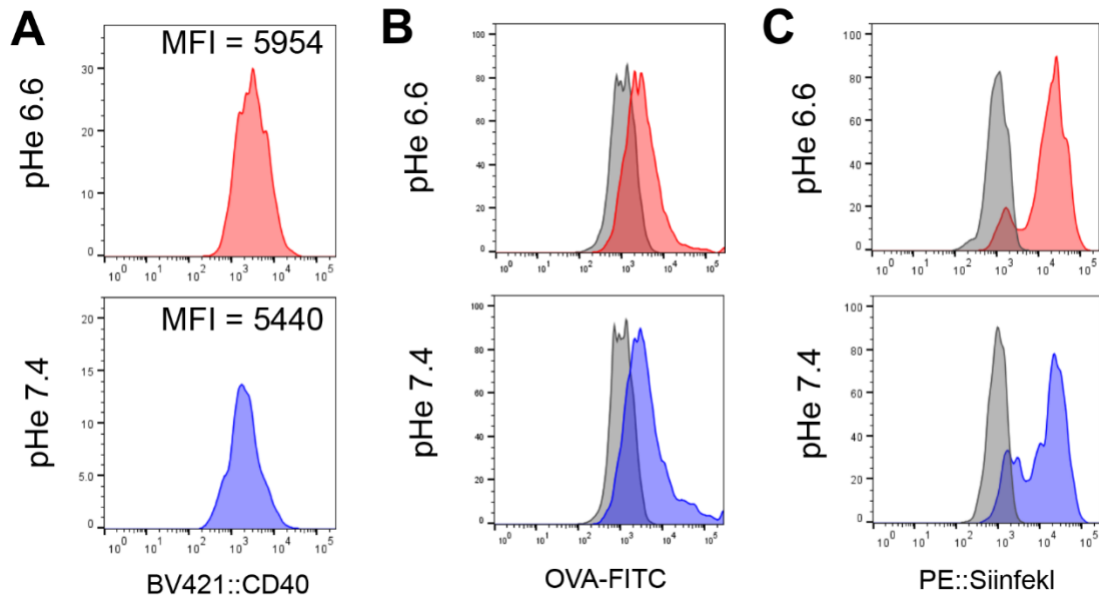

**Supplementary Figure S15:** Low pHe showed no effects on dendritic cell (DC) antigen presenting functions. **(A)** Dendritic cells incubated at pHe 6.6 or 7.4 for 24 hours maintain the same level of CD40 expression. **(B)** Dendritic cells incubated at pHe 6.6 or 7.4 for 24 hours are able to take up FITC-labelled OVA protein. **(C)** Dendritic cells incubated at pHe 6.6 or 7.4 for 24 hours are able to present SIINFPEKL peptide.

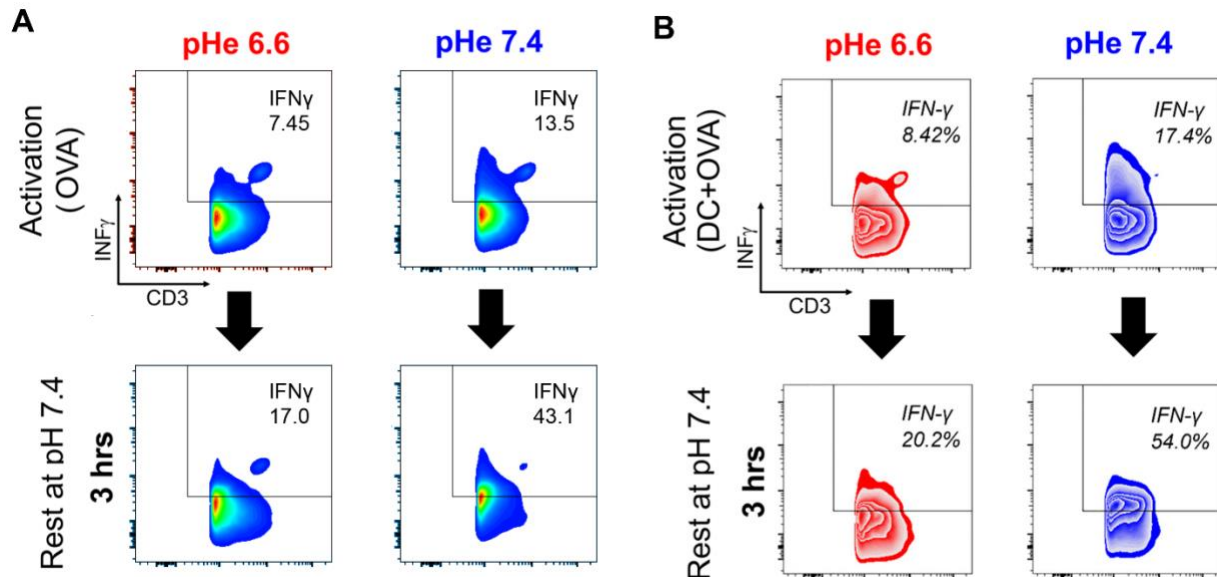

**Supplementary Figure S16:** Rescue of low pHe effects on IFN $\gamma$  production in T cells activated with peptide. **(A)** Intracellular IFN $\gamma$  staining of T cells activated at pHe 6.6 or 7.4 for 24 hours with OVA<sub>257-264</sub> (SIINFPEKL) peptide alone. Cells were then transferred to media at pHe 7.4 and IFN $\gamma$  production measured by flow at 3 and 24 hours thereafter. **(B)** Experiment repeated with the addition of dendritic cells presenting SIINFPEKL peptide during the activation period at pHe 6.6 or 7.4.

A) MCT4  
(H90 SC-50329  
MW~43 kDa)

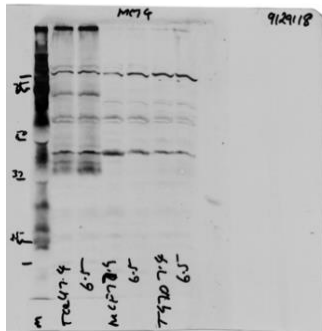

B)  $\beta$  Actin  
(Sigma A1978  
MW- 42kDa)

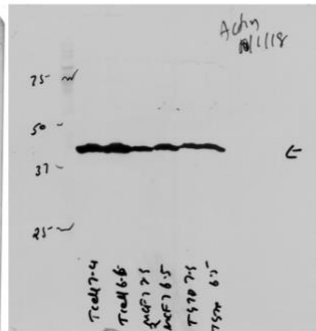

C) MCT1  
(Abcam 90582  
MW ~48 kDa)

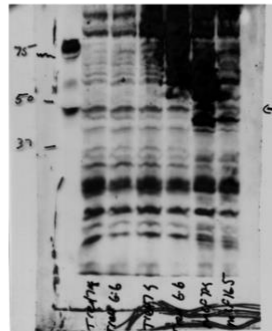

D)  $\beta$  Actin  
(Sigma A1978  
MW- 42kDa)

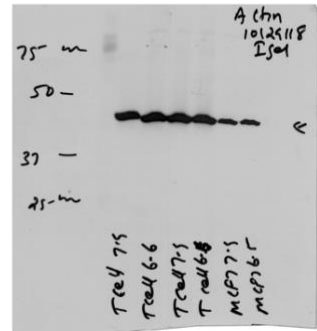

**Supplementary Figure S17.** Whole blots in support of **Figure 3D** for A) MCT4; B) MCT4 actin control; c) MCT1; D) MCT1 actin control.

**Supplementary Figure S18A. Flow gating strategies for cell proliferation and memory phenotype.**

Activated T cells was initially gated with SSC-A & FSC-A, then live cells was gated out for doublet cell exclusion. The CD4 and CD8 cells were picked separately for cell proliferation and memory phenotype analysis.

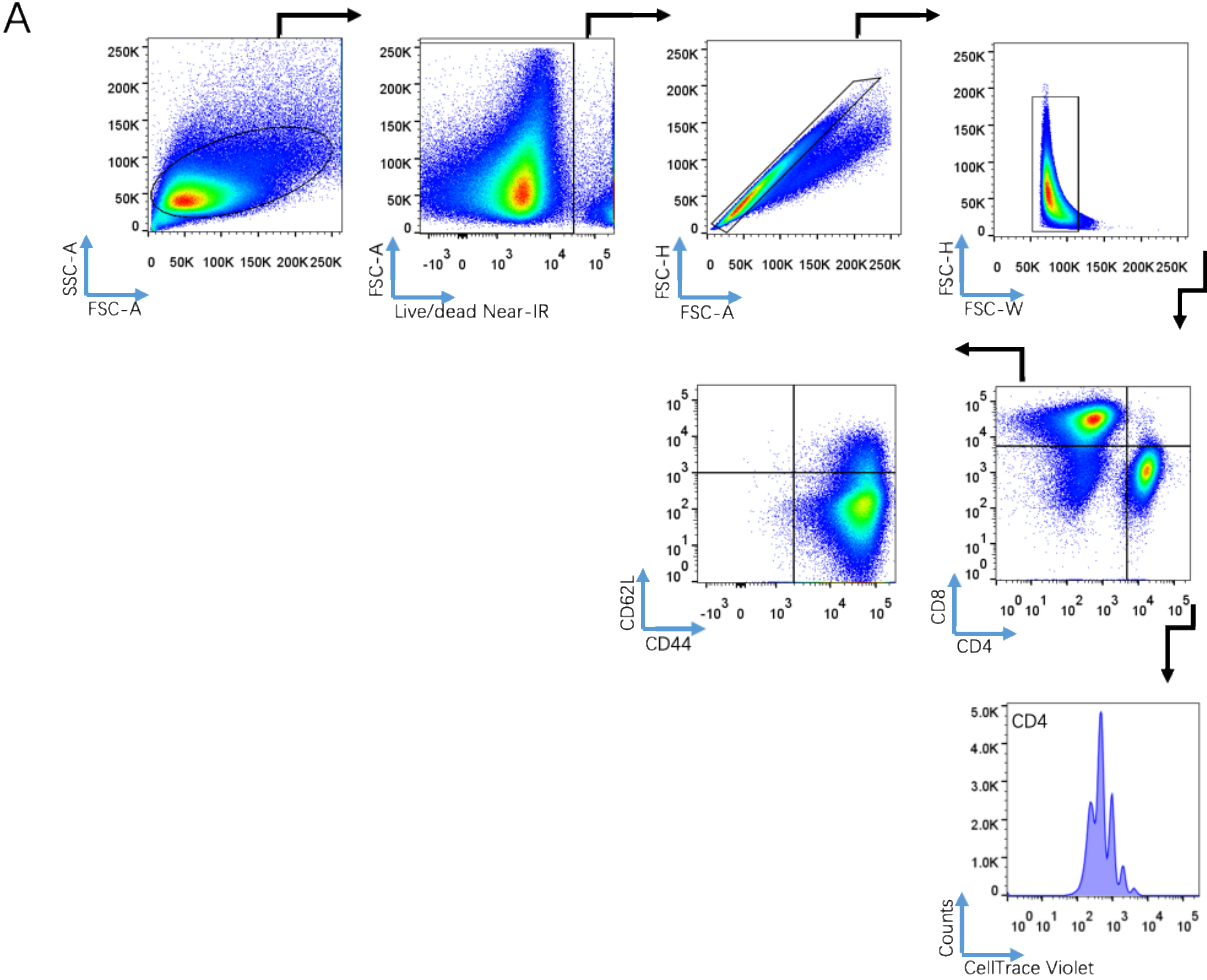



**Supplementary Figure S18B. Representative flow gating strategy for intracellular IFN  $\gamma$  staining.**

Activated T cells was initially gated with SSC-A & FSC-A, then doublet exclusion and live cells were gated. The CD8 T cells were the gated for intracellular IFN  $\gamma$  production.

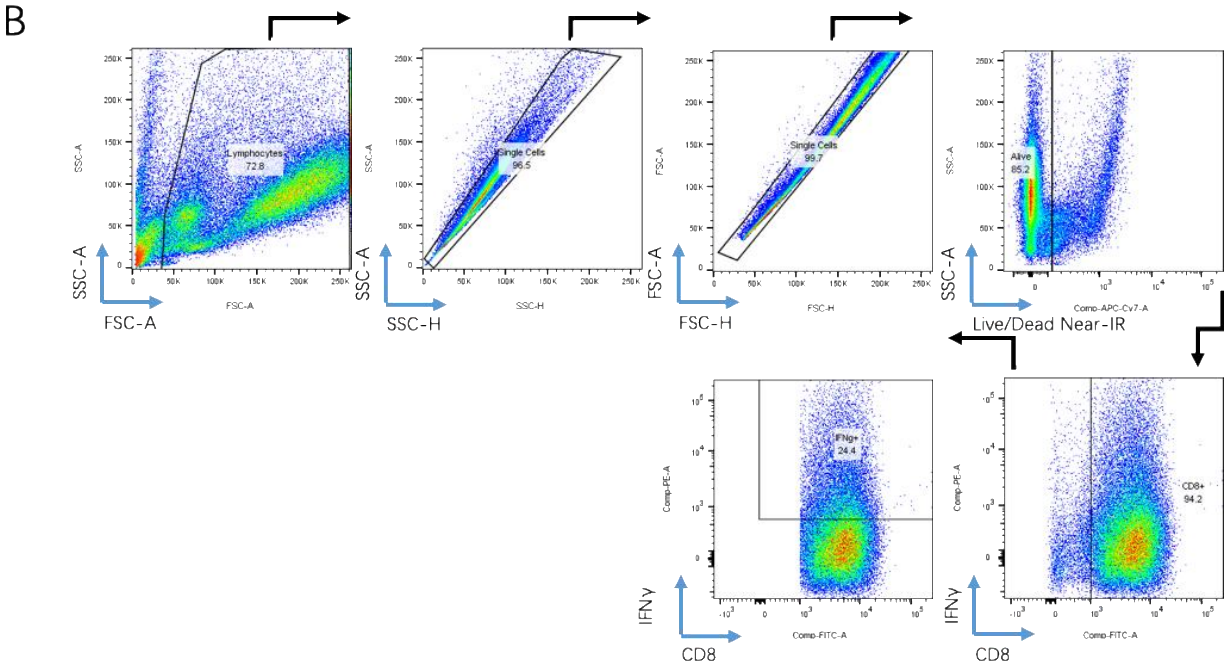

**Supplementary Figure S18C. Representative gating strategy for staining of isolated lymph nodes.**

Single cell suspensions of lymph node lymphocytes were initially gated with SSC-A & FSC-A, then doublet exclusion and live cells were gated. The CD45+ cells were then gated for CD11b, CD19, and CD3 single positive populations. CD3+ cells were gated for CD8 and CD4 populations.

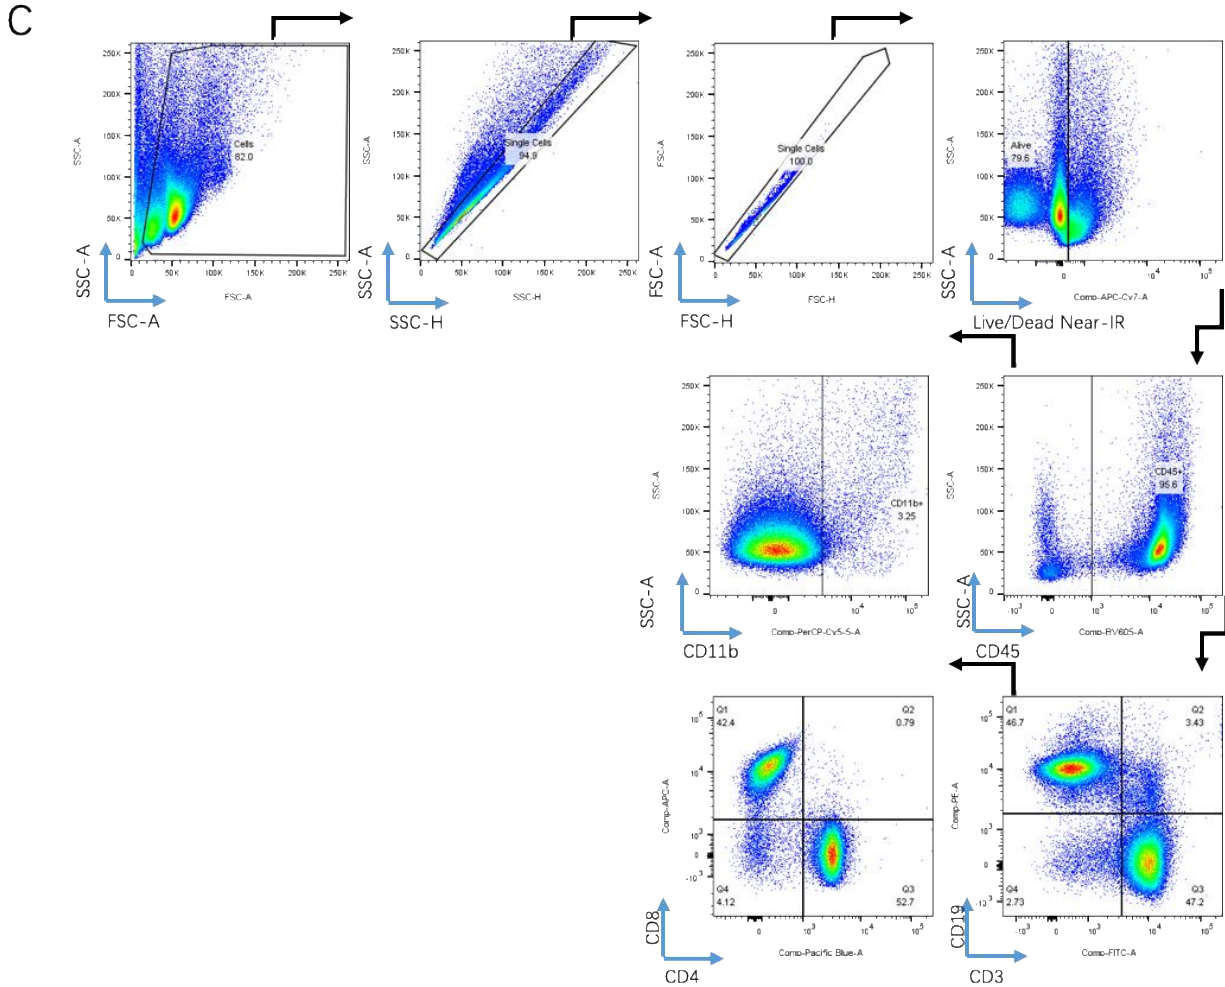



**Supplementary Figure S18D. Representative gating strategy for staining of spleen and lymph node depletion studies.** Single cell suspensions of spleen and lymph node lymphocytes were initially gated with SSC-A & FSC-A, then doublet exclusion and live cells were gated. The CD3+ cells were then gated for and CD4 and CD8 populations were gated off of CD3+ cells.

D

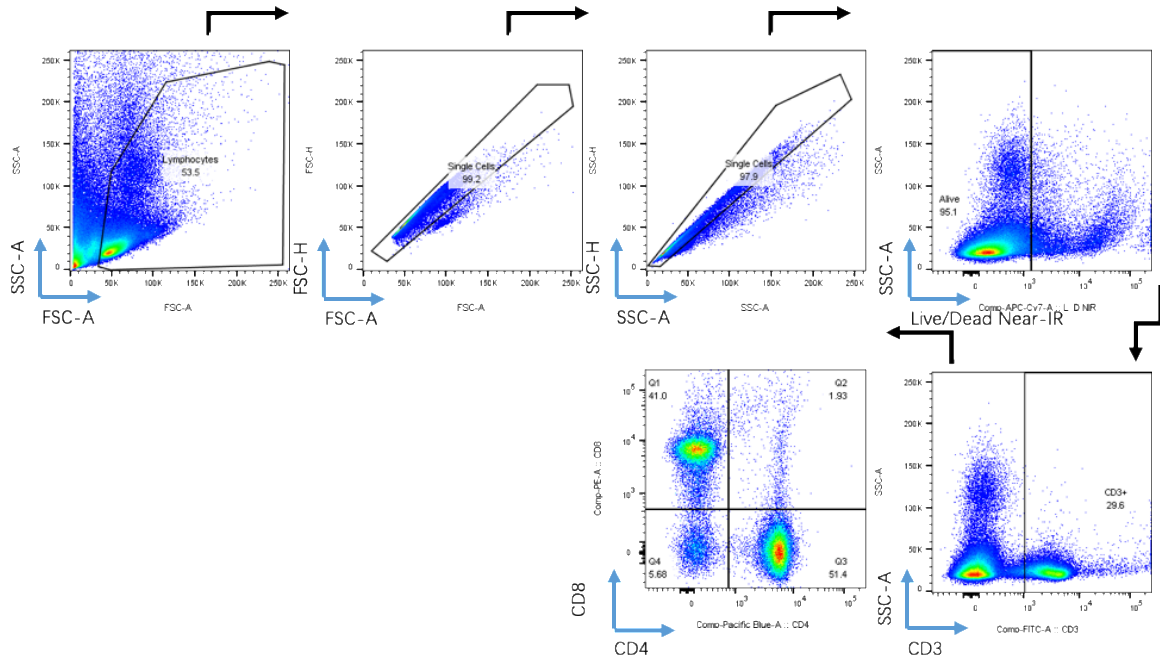

Supplement: 41467_2020_17756_MOESM2_ESM.pdf [file 41467_2020_17756_MOESM2_ESM.pdf]
